# Supplementary material
Source: MDPI journal article supplement (https://www.mdpi.com/2813-0413/2/2/10)
Supplement: s1 [file s1]

## Supplemental File S1

### Prediction Model for 1RM Strength

$$1 \text{ RM Strength} = -6.129 + 15.694(\text{Sagittal Muscle Thickness}) \quad (2)$$

**Table S1.** Prediction Model for One Repetition Maximum

|                                  | Model   |         |         | Descriptives of 1RM (lbs) |       |    |
|----------------------------------|---------|---------|---------|---------------------------|-------|----|
|                                  | B       | SE of B | $\beta$ | Mean                      | SD    | N  |
| <b>Constant</b>                  | -6.129  | 7.884   |         |                           |       |    |
| <b>Sagittal Muscle Thickness</b> | 15.694* | 2.429   | 0.836   | 43.87                     | 11.96 | 20 |
| <b>Model Summary</b>             |         |         |         |                           |       |    |
| <b>R<sup>2</sup></b>             | 0.699   |         |         |                           |       |    |
| <b>F</b>                         | 41.742* |         |         |                           |       |    |

B = unstandardized regression coefficient; SE of B = standard error of the coefficient

$\beta$  = standardized coefficient; SD = standard deviation; N = sample size

R<sup>2</sup> = coefficient of determination

Significance at  $p < 0.05$  denoted by \*

### Prediction Model for Total Repetitions

$$\text{Total Repetitions} = -45.641 + 0.640(\text{Sagittal Corrected Echo Intensity}) \quad (3)$$

**Table S2.** Prediction Model for Total Repetitions

|                                          | Model   |         |         | Descriptives of Repetitions |      |    |
|------------------------------------------|---------|---------|---------|-----------------------------|------|----|
|                                          | B       | SE of B | $\beta$ | Mean                        | SD   | N  |
| <b>Constant</b>                          | -45.641 | 25.249  |         |                             |      |    |
| <b>Sagittal Corrected Echo Intensity</b> | 0.640*  | 0.157   | 0.692   | 56.6                        | 12.7 | 20 |
| <b>Model Summary</b>                     |         |         |         |                             |      |    |
| <b>R<sup>2</sup></b>                     | 0.478   |         |         |                             |      |    |
| <b>F</b>                                 | 16.512* |         |         |                             |      |    |

B = unstandardized regression coefficient; SE of B = standard error of the coefficient

$\beta$  = standardized coefficient; SD = standard deviation; N = sample size

R<sup>2</sup> = coefficient of determination

Significance at  $p < 0.05$  denoted by \*
